# Supplementary material
Source: MDPI journal article supplement (https://www.mdpi.com/2311-7524/10/5/443)
Supplement: s1 [file s1]

Table S2 Major SSR types and their repetition number as identified from the genome sequence of *B. oleracea*

| Repeats      | Mono-        | Di-          | Tri-         | Tetra-      | Penta-      | Hexa-       | total         |
|--------------|--------------|--------------|--------------|-------------|-------------|-------------|---------------|
| 4            | 0            | 0            | 0            | 3678        | 1468        | 962         | 6108          |
| 5            | 0            | 0            | 8115         | 748         | 229         | 249         | 9341          |
| 6            | 0            | 0            | 2592         | 242         | 59          | 70          | 2963          |
| 7            | 0            | 10632        | 1251         | 100         | 15          | 38          | 12036         |
| 8            | 0            | 7600         | 780          | 46          | 5           | 9           | 8440          |
| 9            | 0            | 5474         | 286          | 27          | 0           | 14          | 5801          |
| 10           | 0            | 3913         | 165          | 21          | 0           | 8           | 4107          |
| 11           | 0            | 2820         | 94           | 5           | 0           | 2           | 2921          |
| 12           | 18473        | 2117         | 92           | 7           | 4           | 4           | 20697         |
| 13           | 10994        | 1638         | 59           | 4           | 1           | 2           | 12698         |
| 14           | 7552         | 1338         | 39           | 3           | 0           | 0           | 8932          |
| 15           | 5889         | 1137         | 18           | 2           | 0           | 0           | 7046          |
| 16           | 4347         | 862          | 26           | 0           | 0           | 0           | 5235          |
| 17           | 3101         | 707          | 20           | 0           | 0           | 1           | 3829          |
| 18           | 2350         | 578          | 19           | 0           | 0           | 0           | 2947          |
| 19           | 1778         | 478          | 16           | 0           | 0           | 0           | 2272          |
| 20           | 1463         | 387          | 13           | 0           | 0           | 1           | 1864          |
| 21           | 1246         | 281          | 15           | 0           | 0           | 0           | 1542          |
| 22           | 1015         | 216          | 13           | 1           | 0           | 0           | 1245          |
| 23           | 825          | 173          | 6            | 0           | 0           | 0           | 1004          |
| 24           | 648          | 168          | 6            | 0           | 0           | 0           | 822           |
| 25           | 460          | 98           | 9            | 0           | 0           | 1           | 568           |
| 26           | 366          | 86           | 5            | 0           | 0           | 0           | 457           |
| 27           | 300          | 68           | 3            | 0           | 0           | 1           | 372           |
| 28           | 222          | 52           | 0            | 0           | 0           | 0           | 274           |
| 29           | 191          | 59           | 0            | 0           | 0           | 0           | 250           |
| 30           | 125          | 49           | 1            | 0           | 0           | 0           | 175           |
| 31           | 128          | 38           | 2            | 0           | 0           | 0           | 168           |
| 32           | 104          | 22           | 1            | 0           | 0           | 0           | 127           |
| 33           | 74           | 38           | 1            | 0           | 0           | 0           | 113           |
| 34           | 57           | 38           | 2            | 0           | 0           | 0           | 97            |
| 35           | 43           | 43           | 2            | 0           | 0           | 0           | 88            |
| 36           | 39           | 36           | 0            | 0           | 0           | 0           | 75            |
| 37           | 34           | 34           | 0            | 0           | 0           | 0           | 68            |
| 38           | 22           | 34           | 0            | 0           | 0           | 0           | 56            |
| 39           | 24           | 15           | 0            | 0           | 0           | 0           | 39            |
| 40           | 21           | 15           | 0            | 0           | 0           | 0           | 36            |
| 41           | 16           | 30           | 0            | 0           | 0           | 0           | 46            |
| 42           | 16           | 27           | 0            | 0           | 0           | 0           | 43            |
| 43           | 16           | 29           | 0            | 0           | 0           | 0           | 45            |
| >43          | 265          | 230          | 1            | 0           | 0           | 0           | 496           |
| <b>total</b> | <b>62204</b> | <b>41560</b> | <b>13652</b> | <b>4884</b> | <b>1781</b> | <b>1362</b> | <b>125443</b> |
