# Supplementary material
Source: MDPI journal article supplement (https://www.mdpi.com/2311-7524/10/5/443)
Supplement: s1 [file s1]

**Table S3 Distribution of SSR on different chromosomes of *B. oleracea***

| <b>Chromosome</b> | <b>Counts</b> | <b>Relative abundance</b> | <b>GC content (%)</b> |
|-------------------|---------------|---------------------------|-----------------------|
|                   |               | <b>(loci/Mb)</b>          |                       |
| C01               | 11883         | 226.51                    | 36.56                 |
| C02               | 14597         | 221.17                    | 36.5                  |
| C03               | 18286         | 245.43                    | 36.25                 |
| C04               | 15089         | 230.64                    | 36.24                 |
| C05               | 12966         | 224.03                    | 36.97                 |
| C06               | 11120         | 232.44                    | 36.46                 |
| C07               | 12806         | 228.85                    | 36.7                  |
| C08               | 12066         | 231.76                    | 36.96                 |
| C09               | 15250         | 226.11                    | 36.55                 |
