# Supplementary material
Source: MDPI journal article supplement (https://www.mdpi.com/2311-7524/10/5/443)
Supplement: s1 [file s1]

Table S1 Distribution of the major SSR types identified from the genome sequence of *B. oleracea*

| SSR motif              | Number        | Proportion (%) | Frequency (loci/Mb) |
|------------------------|---------------|----------------|---------------------|
| <b>Mononucleotide</b>  | <b>62204</b>  | <b>49.59</b>   | <b>110.88</b>       |
| A/T                    | 57629         | 45.94          | 102.72              |
| C/G                    | 4575          | 3.65           | 8.15                |
| <b>Dinucleotide</b>    | <b>41560</b>  | <b>33.13</b>   | <b>81.57</b>        |
| AT/AT                  | 27267         | 21.74          | 48.60               |
| AG/CT                  | 12321         | 9.82           | 21.96               |
| AC/GT                  | 1968          | 1.57           | 3.51                |
| CG/CG                  | 4             | 0.00           | 0.01                |
| <b>Trinucleotide</b>   | <b>13652</b>  | <b>10.88</b>   | <b>30.38</b>        |
| AAG/CTT                | 4436          | 3.54           | 7.91                |
| AAT/ATT                | 2548          | 2.03           | 4.54                |
| AAC/GTT                | 1338          | 1.07           | 2.38                |
| ACC/GGT                | 875           | 0.70           | 1.56                |
| ACG/CGT                | 520           | 0.41           | 0.93                |
| AGG/CCT                | 1604          | 1.28           | 2.86                |
| ATC/GAT                | 2156          | 1.72           | 3.84                |
| CCG/CGG                | 175           | 0.14           | 0.31                |
| <b>Tetranucleotide</b> | <b>4884</b>   | <b>3.89</b>    | <b>10.49</b>        |
| AAAC/GTTT              | 457           | 0.36           | 0.81                |
| AAAG/CTTT              | 567           | 0.45           | 1.01                |
| AAAT/AAAT              | 1992          | 1.59           | 3.55                |
| AACT/AGTT              | 238           | 0.19           | 0.42                |
| AATT/AATT              | 458           | 0.37           | 0.82                |
| ATAC/GTAT              | 126           | 0.10           | 0.22                |
| ATAG/CTAT              | 304           | 0.24           | 0.54                |
| others                 | 742           | 0.59           | 3.12                |
| <b>Pentanucleotide</b> | <b>1781</b>   | <b>1.42</b>    | <b>3.82</b>         |
| AAAAC/GTTTT            | 145           | 0.12           | 0.26                |
| AAAAT/ATTTT            | 327           | 0.26           | 0.58                |
| AACCG/CGGTT            | 382           | 0.30           | 0.68                |
| ACTGG/CCAGT            | 17            | 0.01           | 0.03                |
| others                 | 910           | 0.73           | 2.27                |
| <b>Hexanucleotide</b>  | <b>1362</b>   | <b>1.09</b>    | <b>1.99</b>         |
| AAAAAC/GTTTTT          | 58            | 0.05           | 0.10                |
| AAAAAG/CTTTTT          | 70            | 0.06           | 0.12                |
| AAAAAT/ATTTTT          | 86            | 0.07           | 0.15                |
| AAAACC/GGTTTT          | 19            | 0.02           | 0.03                |
| AAAGAG/CTCTTT          | 20            | 0.02           | 0.04                |
| AAATAT/ATATTT          | 30            | 0.02           | 0.05                |
| others                 | 1079          | 0.86           | 1.50                |
| <b>total</b>           | <b>125443</b> | <b>100.00</b>  | <b>223.60</b>       |
