# Supplementary material
Source: MDPI journal article supplement (https://www.mdpi.com/2311-7524/10/5/443)
Supplement: s1 [file s1]

**Table S5 The sequence of the fifty four pairs of SSR primers**

| <b>Primer ID</b>    | <b>Forward (5'-3')</b>   | <b>Reverse (5'-3')</b>  |
|---------------------|--------------------------|-------------------------|
| <i>BolSSR000026</i> | TTCATTCA GTGTGGTTGAAA    | AAAACAACAAGGTTGCAGAT    |
| <i>BolSSR001052</i> | GAAACGGTACTGATGAAAGC     | AACGAGAGAGTGAACCAAAA    |
| <i>BolSSR002169</i> | CCAACCTCAATGTCTTGAAT     | AAAGTCTCAGGCCTATACCC    |
| <i>BolSSR002506</i> | AGTTGTGGAGGCATTATCAC     | ACCCGAAC TAACATAGCAAA   |
| <i>BolSSR003205</i> | GGTGATCCTGGACGTCTTCC     | AGAATTGCCGAAC TCCTAAGC  |
| <i>BolSSR004460</i> | CCTAGCCAAATGATTGAGAT     | GTGGGAAC TCATAGCCAAAA   |
| <i>BolSSR007539</i> | AAGATATGTGGACCAAATGC     | AATTGCCTCTCTTTAAGGCT    |
| <i>BolSSR007971</i> | ATGAAAACCTTGAGATGTGG     | AACAAACAAACAAACGCTCT    |
| <i>BolSSR008152</i> | TGAGACCCGAGAGTTAAAAA     | AACGAATTTACGACAGATCG    |
| <i>BolSSR009441</i> | CATCCTTCTCCTTGCTTTTA     | AAATATGAGTTCAGCGAGGA    |
| <i>BolSSR009823</i> | TCACTAGCCACTTTAGGAGCC    | AGTGGACCATGGATTGCTGG    |
| <i>BolSSR014499</i> | TGCGATTCTGATAGATCTCC     | TACAGGGGTGATAAGTGACC    |
| <i>BolSSR057533</i> | TCATTGATGGAGTATGTGAA     | CGTTACGTTGCATAGAATCA    |
| <i>BolSSR016035</i> | ACTCCTTCCTTCACTTCTCC     | ACTGGGTAGAAGCAGAGACA    |
| <i>BolSSR017491</i> | TTTTTCTTTTAACAGCTGGG     | TTCGTTTCTCTTTTGTTAAGG   |
| <i>BolSSR018633</i> | AAAAGGAGATACCTGAAGGG     | CTGTCTGAAGAAAAGATCGG    |
| <i>BolSSR021757</i> | CCTCAACCTTGTTAGTCGAG     | AAGATTCACTGCAAAAGCAT    |
| <i>BolSSR024526</i> | GGGTGAACCCAAGAATAAAT     | CCAAACCTGATTATTCCTTT    |
| <i>BolSSR027265</i> | GTCCAGGTTAAAATGCTCAG     | CCCAACAGAAAGAAACTCAC    |
| <i>BolSSR028997</i> | TGCAATACTTGCTTATGTGG     | GTATTCGATTTAAATAGTTTGTC |
| <i>BolSSR029692</i> | ACTATGATCCAATAAGCCGA     | GCAAATAAATCCAATCTTCG    |
| <i>BolSSR035058</i> | CGTTCCTTTTCTGAGTCAAC     | AAGAAAGAAACCAGAAAAAGAA  |
| <i>BolSSR031249</i> | TCTGTTTAGGGCTGTTCAAT     | TACCGAACCATATCCAAATC    |
| <i>BolSSR038129</i> | TACTCTCGAAAGATCGAAGC     | AGTGAGTCAAATGGGCTAAA    |
| <i>BolSSR039332</i> | TGCACAAAATTGAATTGAGA     | AGGAGATCTTCGACCCTTAC    |
| <i>BolSSR039798</i> | ACAAC TGGTGGACATTTAGG    | TTACAAAGCCCATTTAGGAA    |
| <i>BolSSR040726</i> | GCAGTTCATGAAGTTTCTCC     | CCGTATGATCTCTCAGGAAG    |
| <i>BolSSR044427</i> | CGACTCTGATCCTACTACCG     | GAGTATAATCAATTTGGCCG    |
| <i>BolSSR045579</i> | TTTTTGTCCATATACGAGGG     | TTGAGATTCTATTGCTGGGT    |
| <i>BolSSR030903</i> | GAAATTGGCATGCATATACTCTGC | AGAGGTCTTCCAGTTTGTTAACG |
| <i>BolSSR059526</i> | ATGCAGAGAAACAAAGGAGA     | ATCCATCAATATAACACGGC    |
| <i>BolSSR060281</i> | ATAATGGTTGACCAGCAATC     | TGTGGTTTGTTGATTGGTAA    |
| <i>BolSSR061903</i> | CTTAGCTCCTCTCAAACGAC     | CTCATCTTCTTCCTCCTGTG    |
| <i>BolSSR056868</i> | CCTTCTCCTTTCTTCTTCGT     | AGATAGGAGGGTGAGGAGAG    |
| <i>BolSSR063024</i> | CATTTGTGAATCACCAGAAA     | ACCAATTGGGTCTTCTTCTT    |
| <i>BolSSR055078</i> | AGCCGGTTTCCAATACATAAGG   | TATTGGATCCACAGCCCTCG    |
| <i>BolSSR057239</i> | GCTAGGCAAGAGAGAAAAACA    | AGCAAATCAATCAAGCAAAT    |

| Primer ID           | Forward (5'-3')      | Reverse (5'-3')       |
|---------------------|----------------------|-----------------------|
| <i>BolSSR053957</i> | ATTCAGAAAGTGAGCTTCCA | CTCTAGCGAGTTGACCTGAG  |
| <i>BolSSR051866</i> | TCACTCGCTATACGTTGTTG | ATGATCATGATGAAAAAGGC  |
| <i>BolSSR052736</i> | AACACTCTCGTTGAATTGCT | AAACTCGTCTGGAAGTTGAA  |
| <i>BolSSR065129</i> | TGGAAAGGAGGTTCTGATTA | AGCAAGGTTAAACTCATGGA  |
| <i>BolSSR064292</i> | TTTGGAAGAAGAAAGAGGAA | TCATCTCCCTATAACCTCCC  |
| <i>BolSSR066510</i> | TTAATAATCCCGTTCCAGAG | TACGAATTTGCTTCGATTCT  |
| <i>BolSSR066830</i> | TCTCCAGCAAGACAATTCT  | TTAATCAGATCGGAGTTCGT  |
| <i>BolSSR070186</i> | TCCTAATCTTCCTCCCTTTC | CATGTTTCATGTGAAGGATCA |
| <i>BolSSR071665</i> | CTCTCGAACAGGCTAAGAAA | GCACGTAAAACGAATCTACC  |
| <i>BolSSR072679</i> | CTTAAATTTGAGTCCGTTG  | AATTCAAAATCAGACGGAGA  |
| <i>BolSSR073675</i> | GACCTTGAGTGCTAGTTTGG | ACGGTGGTTGAAGAAGTCTA  |
| <i>BolSSR076246</i> | ATGATGGAGCCAAAGTAAAA | ATCTTCGTAGCCATTGGTAA  |
| <i>BolSSR078112</i> | AAAAAGAATCACGGTTTTGA | CCAAAACAATAAATGAGCC   |
| <i>BolSSR064485</i> | ATATGACTCACAAGGCCAAC | GAACGGTCACTTTGACTAGC  |
| <i>BolSSR080017</i> | TGATGGCTTTCTTACATCCT | GTGCTTTGTTGTTGTTGCTA  |
| <i>BolSSR081968</i> | AGAAGAAGAAAGCAGCAATG | CATCATCCCTGGATCTTTTA  |
| <i>BolSSR082001</i> | TCTCCCAATTAGCCATTAAA | ATGTATATTTACGGATGGG   |
